# Supplementary material
Source: Springer Nature journal article supplement (https://www.springermedizin.de/resource/supplementary/13229_2014_148_MOESM6_ESM.pdf/9676288)

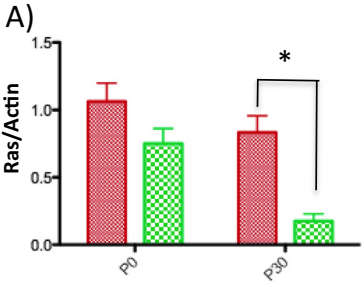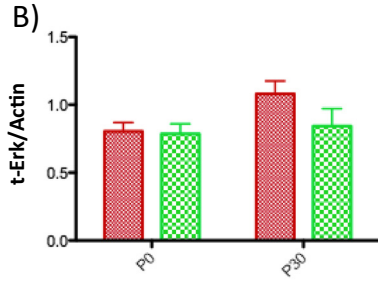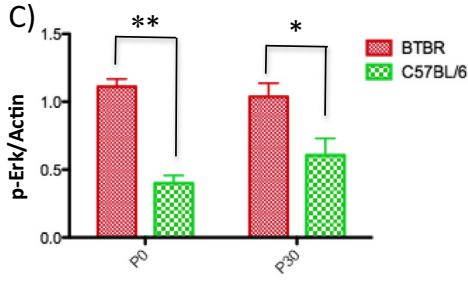

Supplement: MOESM6 [file 9676288]
